# Supplementary material
Source: PubMed Central journal article supplement (PMC5728632)
Supplement: ba009472-suppl1.pdf [file ba009472-suppl1.pdf]

**Supplemental Table 1. Detailed Immunohistochemical Findings of Consensus-Confirmed Cases of GZL (N=26).**

| Biopsy Site        | CD20 | CD79a | PAX5 | OCT2 | MUM1 | CD30 | CD15 | CD3     | EBER |
|--------------------|------|-------|------|------|------|------|------|---------|------|
| Supraclavicular LN | 4/+3 | 4/+3  | 4/+3 | 4/+3 | 4/+3 | 4/+3 | 3/+3 | T-cells | Neg  |
| Axillary LN        | 4/+3 | 4/+3  | 4/+3 | 2/+2 | 4/+3 | 1/+2 | Neg  | T-cells | Neg  |
| Neck LN            | 4/+3 | 4/+2  | 4/+3 | NA   | NA   | 1/+2 | Neg  | T-cells | Neg  |
| Mediastinum        | 4/+3 | 4/+2  | 4/+2 | 4/+1 | 4/+3 | 4/+1 | Neg  | T-cells | Neg  |
| Mediastinum        | 4/+3 | 4/+2  | 4/+1 | 2/+3 | 4/+3 | Neg  | Neg  | T-cells | Neg  |
| Pancreas           | 4/+3 | 4/+2  | 4/+1 | 2/+2 | 2/+2 | Neg  | 1/+1 | T-cells | Neg  |
| Mediastinum        | 4/+3 | 4/+2  | 4/+1 | 2/+1 | 4/+3 | 4/+2 | 4/+2 | T-cells | Neg  |
| Mediastinum        | 4/+3 | 4/+1  | 4/+3 | NA   | NA   | 4/+3 | Neg  | T-cells | Neg  |
| Neck LN            | 4/+3 | 4/+1  | 4/+3 | 4/+2 | 4/+3 | 4/+2 | 2/+2 | T-cells | Neg  |
| Mediastinum        | 4/+3 | 4/+1  | NA   | NA   | NA   | 4/+3 | 1/+1 | T-cells | Neg  |
| Mediastinum        | 4/+3 | 2/+1  | 4/+1 | NA   | 4/+3 | 4/+3 | 2/+1 | T-cells | Neg  |
| LN                 | 4/+3 | 1/+1  | 4/+2 | 4/+1 | 4/+3 | 4/+2 | 2/+3 | T-cells | Neg  |
| LN                 | 4/+3 | 1/+1  | 2/+1 | 4/+2 | 4/+3 | 1/+1 | Neg  | T-cells | Neg  |
| SubQ tissue        | 4/+3 | NA    | 4/+3 | NA   | 4/+3 | 4/+2 | Neg  | T-cells | Neg  |
| LN & Mediastinum   | 4/+3 | Neg   | 4/+2 | 4/+1 | 4/+3 | 4/+2 | 2/+2 | T-cells | Neg  |
| Mediastinum        | 4/+3 | NA    | 4/+1 | NA   | 4/+3 | 4/+3 | 4/+3 | T-cells | Neg  |
| Mediastinum        | 4/+3 | Neg   | NA   | NA   | NA   | 4/+1 | 4/+3 | T-cells | Neg  |
| Mediastinum        | 4/+2 | 4/+3  | 4/+2 | NA   | 4/+3 | 2/+1 | 2/+1 | T-cells | Neg  |
| Mediastinum        | 4/+2 | 4/+2  | 4/+1 | 2/+2 | 4/+3 | 4/+2 | 1/+1 | T-cells | Neg  |
| Mediastinum        | 4/+2 | 4/+1  | 4/+1 | 4/+1 | 4/+3 | 4/+3 | 2/+1 | T-cells | Neg  |
| LN                 | 4/+1 | 4/+1  | 4/+1 | 4/+3 | 4/+3 | 4/+3 | Neg  | T-cells | Pos  |
| Iliac LN           | 1/+1 | 1/+2  | 1/+2 | NA   | 4/+3 | 4/+3 | Neg  | T-cells | Neg  |
| Mediastinum        | Neg  | Neg   | 4/+2 | 1/+2 | 4/+3 | 4/+3 | 1/+2 | T-cells | Neg  |
| Inguinal LN        | Neg  | Neg   | 4/+2 | 4/+1 | 4/+3 | 4/+3 | Neg  | T-cells | Neg  |
| Neck & Mediastinum | Neg  | Neg   | 4/+2 | Neg  | 4/+3 | 4/+3 | Neg  | T-cells | Neg  |
| Mediastinum        | Neg  | Neg   | 4/+1 | 4/+1 | 4/+3 | 4/+2 | 4/+2 | T-cells | Neg  |

Abbreviations: No: case number; LN: Lymph node; GZL: gray zone lymphoma; SubQ: subcutaneous; NA: not available; Neg: negative; Pos: positive; EBER: Epstein Barr Virus in situ hybridization.

**Supplemental Table 2. Consensus Diagnoses and Detailed Immunohistochemical Findings in *Reclassified* Cases (N=42).**

| Site                 | Revised Diagnosis | CD20   | CD79a | PAX5 | OCT2 | MUM1 | CD30 | CD15    | CD3     | EBER |
|----------------------|-------------------|--------|-------|------|------|------|------|---------|---------|------|
| Axillary LN          | cHL               | 4/+3   | 4/+3  | 4/+3 | 4/+3 | NA   | 4/+3 | Neg     | T-cells | Neg  |
| Mediastinum          | cHL               | 1/+1   | NA    | Neg  | NA   | NA   | 4/+2 | Neg     | T-cells | Neg  |
| Bone                 | cHL               | 4/+2   | 1/+1  | 1/+1 | 1/+1 | 4/+3 | 4/+1 | Neg     | T-cells | Pos  |
| LN                   | cHL               | 4/+2   | NA    | NA   | NA   | 4/+2 | 4/+2 | NA      | NA      | Neg  |
| Mediastinum          | cHL               | 4/+3   | NA    | 4/+1 | NA   | NA   | Neg  | Neg     | T-cells | Pos  |
| LN                   | cHL               | 4/+3   | NA    | 4/+2 | NA   | NA   | 4/+2 | Neg     | T-cells | Pos  |
| LN                   | cHL               | Ritux. | 1/+1  | NA   | NA   | NA   | 4/+1 | Partial | T-cells | Neg  |
| Bone Marrow          | cHL               | 4/+3   | NA    | 4/+1 | NA   | NA   | 4/+1 | Neg     | T-cells | Neg  |
| LN                   | cHL               | 4/+3   | NA    | Neg  | NA   | NA   | 1/+1 | Neg     | T-cells | Neg  |
| Liver                | cHL               | Neg    | 4/+3  | 4/+1 | NA   | NA   | 4/+1 | Neg     | T-cells | Neg  |
| LN                   | cHL               | Neg    | 4/+1  | 4/+2 | NA   | NA   | 4/+3 | 2/+1    | T-cells | Neg  |
| Mediastinum          | cHL NS            | 4/+2   | 4/+1  | 4/+2 | 4/+1 | 4/+3 | Neg  | Neg     | T-cells | Neg  |
| Mediastinum          | cHL NS            | Neg    | Neg   | 4/+1 | 4/+1 | 4/+3 | 4/+2 | Neg     | T-cells | Neg  |
| Chest wall           | cHL NS            | 4/+3   | 4/+2  | 4/+3 | 4/+3 | 4/+3 | 4/+3 | 1/+1    | T-cells | Pos  |
| LN                   | cHL NS            | 4/+3   | 4/+2  | 4/+3 | 4/+3 | 4/+3 | 2/+3 | 2/+3    | T-cells | Pos  |
| Thymus               | cHL NS            | Neg    | 2/+2  | 4/+3 | 2/+2 | 4/+3 | 2/+2 | 4/+3    | T-cells | Neg  |
| Mediastinum          | cHL NS            | 4/+3   | 2/+1  | 4/+1 | NA   | NA   | 4/+1 | Neg     | T-cells | Neg  |
| Supraclavicular LN   | cHL NS2           | 4/+3   | 4/+3  | 4/+3 | 4/+1 | 4/+2 | 4/+3 | 1/+1    | Neg     | Pos  |
| R Neck LN            | cHL NS2           | 4/+3   | Neg   | Neg  | 1/+1 | 4/+3 | 4/+3 | 4/+2    | T-cells | Neg  |
| Supraclavicular LN   | cHL NS2           | Neg    | NA    | 4/+1 | Neg  | 4/+3 | 4/+1 | 1/+1    | T-cells | Neg  |
| Anterior Mediastinum | cHL NS2           | 4/+3   | NA    | 4/+3 | NA   | 4/+3 | 4/+3 | Neg     | T-cells | Neg  |
| NA                   | cHL NS2           | Neg    | NA    | Neg  | NA   | NA   | 4/+2 | Neg     | NA      | Neg  |
| Mediastinum          | cHL NS2           | 4/+2   | 4/+3  | 4/+2 | 4/+2 | 4/+3 | 4/+3 | 3/+2    | T-cells | Neg  |
| Mediastinum & Lung   | cHL NS2           | 1/+1   | 1/+1  | 1/+1 | 1/+1 | 4/+3 | 4/+3 | 4/+2    | T-cells | Neg  |
| NA                   | cHL NS2           | Neg    | Neg   | 4/+2 | Neg  | 4/+3 | 4/+2 | Neg     | T-cells | Neg  |

|                           |           |      |      |      |      |      |      |      |         |     |
|---------------------------|-----------|------|------|------|------|------|------|------|---------|-----|
| Lung                      | cHL NS2   | 4/+2 | Neg  | 4/+2 | 1/+1 | 4/+3 | 4/+2 | 1/+1 | T-cells | Neg |
| Lung                      | cHL NS2   | 1/+1 | Neg  | 1/+1 | 3/+3 | 4/+3 | 2/+1 | 2/+1 | T-cells | Neg |
| Cervical LN               | cHL LR    | 1/+1 | Neg  | 1/+1 | 1/+1 | 4/+2 | 1/+1 | Neg  | NA      | Pos |
| LN                        | NLPHL     | 4/+2 | NA   | NA   | NA   | Neg  | 4/+1 | NA   | NA      | Neg |
| Lung                      | NLPHL     | 4/+3 | 1/+2 | 4/+2 | 4/+3 | 4/+3 | 4/+1 | Neg  | T-cells | Pos |
| Subcarinal LN             | NLPHL     | 4/+3 | 4/+2 | 4/+2 | 4/+2 | 4/+2 | Neg  | Neg  | T-cells | Neg |
| Spleen                    | NLPHL     | 4/+3 | NA   | 4/+1 | NA   | NA   | 2/+1 | Neg  | T-cells | Neg |
| Mediastinum               | PMBCL     | 4/+3 | 4/+3 | 4/+3 | 4/+3 | 4/+3 | 2/+2 | Neg  | T-cells | Neg |
| Mediastinum               | PMBCL     | 4/+3 | NA   | 4/+1 | NA   | 4/+3 | 4/+3 | Neg  | T-cells | Neg |
| Supraclavicular LN        | DLBCL     | 4/+3 | NA   | 4/+3 | 4/+2 | 1/+1 | Neg  | Neg  | T-cells | Neg |
| L Cervical LN             | DLBCL     | 4/+3 | NA   | 4/+3 | 4/+2 | 4/+2 | 2/+1 | Neg  | T-cells | Neg |
| Supraclavicular LN        | DLBCL     | 4/+3 | 4/+3 | 4/+3 | 2/+3 | 1/+3 | Neg  | Neg  | T-cells | Neg |
| GE Junction               | DLBCL     | 4/+1 | 4/+3 | 4/+1 | 4/+1 | 4/+3 | 4/+3 | Neg  | NA      | Neg |
| LN                        | DLBCL     | 2/+3 | 4/+3 | 4/+3 | Neg  | 4/+3 | 4/+3 | Neg  | T-cells | Neg |
| Paravertebral Soft Tissue | EBV DLBCL | 4/+3 | Neg  | Neg  | 4/+3 | 4/+3 | 4/+2 | Neg  | T-cells | Pos |
| Peri-aortic LN            | EBV DLBCL | 4/+3 | 4/+2 | 4/+2 | 4/+1 | 4/+3 | 2/+2 | Neg  | T-cells | Pos |
| LN                        | EBV DLBCL | 4/+3 | NA   | 4/+1 | NA   | NA   | 4/+3 | Neg  | T-cells | Pos |

Abbreviations: No: case number; L: Left; R: Right; LN: Lymph node; NA: not available; M: male; F: female; Neg, Negative; cHL: Classic Hodgkin lymphoma; cHL NS: Classic Hodgkin lymphoma nodular sclerosis; cHL NS2: Classic Hodgkin lymphoma nodular sclerosis type 2; DLBCL: Diffuse large B cell lymphoma; EBV: Epstein Barr Virus; EBV DLBCL: EBV positive diffuse large B cell lymphoma; NLPHL: Nodular lymphocyte predominant Hodgkin lymphoma; PMBL: Primary mediastinal large B cell lymphoma; Ritux: Negative staining with status post rituximab.

**Supplemental Table 3. Baseline Characteristics: Re-Classified Cases.**

| Patient characteristics   |  | N (%)                   | Disease characteristics         |                                                | N (%)   |
|---------------------------|--|-------------------------|---------------------------------|------------------------------------------------|---------|
| <b>Median age</b>         |  | 37 years (range, 19-72) |                                 | <b>Mediastinal involvement/disease</b> 15 (41) |         |
| <b>Gender</b>             |  |                         | <b>Bone marrow involvement</b>  |                                                |         |
| Male                      |  | 27 (75)                 | Absent                          |                                                | 31 (86) |
| Female                    |  | 9 (25)                  | Present                         |                                                | 4 (11)  |
|                           |  |                         | NA                              |                                                | 1 (3)   |
| <b>Performance status</b> |  |                         | <b>Extranodal sites present</b> |                                                |         |
| 0-1                       |  | 30 (83)                 | <=1                             |                                                | 27 (75) |
| 2-4                       |  | 5 (14)                  | >1                              |                                                | 9 (25)  |
| NA                        |  | 1 (3)                   |                                 |                                                |         |
| <b>B symptoms</b>         |  |                         | <b>Stage</b>                    |                                                |         |
| Yes                       |  | 18 (50)                 | I/II                            |                                                | 16 (44) |
| No                        |  | 15 (42)                 | III/IV                          |                                                | 20 (56) |
| NA                        |  | 3 (8)                   |                                 |                                                |         |
| <b>Albumin</b>            |  |                         | <b>Bulky disease</b>            |                                                |         |
| Normal                    |  | 12 (33)                 | Yes                             |                                                | 11 (30) |
| Low                       |  | 21 (58)                 | No                              |                                                | 24 (67) |
| NA                        |  | 3 (9)                   | NA                              |                                                | 1 (3)   |
| <b>Hemoglobin, g/dL</b>   |  |                         | <b>IPI</b>                      |                                                |         |
| Decreased                 |  | 24 (67)                 | 0-2                             |                                                | 24 (67) |
| Normal                    |  | 11 (30)                 | 3-5                             |                                                | 11 (30) |
| NA                        |  | 1 (3)                   | NA                              |                                                | 1 (3)   |
| <b>LDH</b>                |  |                         | <b>IPS</b>                      |                                                |         |
| Normal                    |  | 14 (39)                 | 0-1                             |                                                | 4 (11)  |
| Elevated                  |  | 22 (61)                 | 2-3                             |                                                | 16 (45) |
|                           |  |                         | 4-6                             |                                                | 9 (25)  |
|                           |  |                         | NA                              |                                                | 7 (19)  |

Abbreviations: N, number; LDH, lactate dehydrogenase; NA, not available; IPI, International Prognostic Index; IPS, International Prognostic Score.
